1 **Title:** Developing a Core Outcome Set for capturing and measuring nurse wellbeing: A Delphi study.

2 **Authors:** Naomi Klepacz<sup>\*1,2</sup>, David S. Baldwin<sup>2,3,4,5</sup>, Gemma Simons<sup>2,3,4,6</sup>

3

4 1. School of Health Sciences, University of Southampton, Southampton, UK.

5 2. National Institute for Health Research (NIHR) Applied Research Collaboration Wessex (ARC Wessex).

6 3. University Department of Psychiatry, Clinical and Experimental Sciences, Faculty of Medicine,  
7 University of Southampton, Southampton, UK

8 4. Hampshire and Isle of Wight NHS Foundation Trust, Southampton, UK

9 5. University Department of Psychiatry and Mental Health, University of Cape Town, Cape Town, South  
10 Africa.

11 6. Salisbury NHS Foundation Trust, Salisbury, Wiltshire, UK

12

13 \*Corresponding author: Dr Naomi Klepacz [n.klepacz@soton.ac.uk](mailto:n.klepacz@soton.ac.uk)

14 **ABSTRACT**

15 **Background:** Poor nurse wellbeing is a significant concern, adversely affecting patient care quality and  
16 satisfaction, contributing to poor job satisfaction, increased sickness absence and workforce retention issues.  
17 There are calls for evidence-based policies and interventions to address poor nurse wellbeing, but no  
18 consensus exists on how it should be captured and measured. We used a salutogenic and consensus approach  
19 to develop a core outcome set (COS) for capturing and measuring nurse wellbeing.

20  
21 **Methods:** A Delphi methodology was employed. Participants were recruited from two stakeholder groups: 1)  
22 nurse wellbeing professionals, identified through relevant publications, conference/meeting attendance lists,  
23 and peer recommendations, and 2) Registered Nurses, recruited via social media, professional nursing bodies,  
24 and practitioner networks. The stakeholder panel completed two rounds of an online Delphi survey, rating 43  
25 previously identified wellbeing outcomes on a nine-point Likert Scale, from 'not important' to 'critical'.  
26 Consensus was defined as  $\geq 75\%$  of stakeholders agreeing a wellbeing outcome was critical for inclusion in the  
27 COS.

28  
29 **Results:** Fifty-four stakeholders completed the first Delphi Round, and 45 participated in both rounds. Thirteen  
30 wellbeing outcomes met the *a-priori* threshold for inclusion in the COS: General Wellbeing, Health, Sleep,  
31 Positive Relationships, Personal Safety, Psychological Needs Satisfaction, Psychological Safety, Job  
32 Satisfaction, Morale, Life Work Balance, Compassion Satisfaction, Satisfaction with Patient Care, and Good  
33 Nursing Practice. The final COS was agreed by the stakeholder panel, without amendments.

34  
35 **Conclusion:** This study establishes a COS for capturing and measuring nurse wellbeing. Implementing this COS  
36 has the potential to enable consistent data collection and evidence synthesis needed to support the  
37 development of nurse wellbeing strategies, policies and interventions. Future research will focus on identifying  
38 valid and reliable measurement tools.

39  
40 **Trial Registration:** This study was prospectively registered with the COMET initiative [www.comet-](http://www.comet-initiative.org)  
41 [initiative.org](http://www.comet-initiative.org) (Registration: 2433)

42  
43 **Keywords:** Delphi Study; Core Outcome Set; Nursing workforce; Nurse Wellbeing; NHS.

44

## 45 **Developing a Core Outcome Set for capturing and measuring nurse wellbeing: A Delphi Study**

### 46 **INTRODUCTION**

47 Nurse wellbeing is an important indicator of the state of the nursing workforce. Poor nurse wellbeing impacts  
48 patient satisfaction and care quality, sickness absence, job satisfaction and leads to staff leaving the  
49 workforce.(1, 2, 3, 4, 5, 6) Wellbeing can be considered a continuum ranging from poor on one end to  
50 happiness, thriving and flourishing on the other. (7) However, most studies with nurses have focused on  
51 burnout (e.g.,(8, 9, 10)) and psychiatric morbidity (e.g.,(11, 12)), so little is known about positive (*'salutogenic'*)  
52 indicators of wellbeing in this profession. (7)

53

54 Nurses constitute the largest group of clinical staff in the NHS, accounting for approximately 50% of the  
55 workforce. (13) Despite their deep commitment to providing high-quality patient care, many nurses  
56 experience poor wellbeing, stress and burnout. (7, 14) Physical and mental ill-health, burnout and exhaustion  
57 currently follow retirement as the top reason nurses leave the profession.(15) The 2023 NHS staff survey  
58 reports that 42% of nurses found their work emotionally exhausting, 46% experienced work-related stress, and  
59 58% came to work despite not feeling well enough to perform their duties (so-called 'presenteeism').(16)  
60 While nurses strive to prevent their own sub-optimal wellbeing from adversely affecting patient care, (7)  
61 employers must recognise the direct link between nurse wellbeing and patient safety and satisfaction.(17)  
62 Ensuring nurse wellbeing is not only good for the nurses themselves but is essential for the health and safety  
63 of patients and key to nurse retention.

64

65 Nurse wellbeing is more than the absence of work-related stress, injury or disease; it is achieving good physical  
66 and mental health amongst the nursing workforce. (18) Nurse leaders have a professional responsibility to  
67 create healthy working environments that promote and sustain wellbeing. Managers, therefore, need a  
68 greater understanding of how nursing and the workplace impact nurse wellbeing and how to engage with staff  
69 who need support. (18) Effective decisions and strategies to improve nurse wellbeing must be grounded in  
70 reliable data, ensuring a robust evidence base. (19) A sharper focus on the drivers of positive nurse wellbeing  
71 is necessary to inform the development of policies, strategies, and interventions that will enable the nursing  
72 profession to flourish and thrive. However, wellbeing is a complex construct that includes measures and  
73 manifestations that have not yet been tested empirically among nurses. (7) No single measure can provide a  
74 complete picture of nurse wellbeing.

75

76 A Core Outcome Set (COS) offers an agreed minimum for what should be captured, measured and reported.  
77 (20) Our study takes a salutogenic (21) and consensus approach to developing a COS to capture and measure  
78 the wellbeing of nurses working in the NHS. It is anticipated that the consistent capture, measurement, and

79 reporting of these outcomes will facilitate comparison by enhancing the ability to aggregate and analyse nurse  
80 wellbeing data, which is necessary to support policy, strategy and intervention development. This work builds  
81 on our previous study to develop a Core Outcome Set for capturing and measuring the wellbeing of doctors  
82 working in the NHS(22), so we have the additional objective of identifying potential convergence between the  
83 consensus outcomes for doctor and nurse wellbeing.

84

## 85 **METHODS**

### 86 **Design**

87 The study protocol was developed following Core Outcome Measures in Effectiveness Trials (COMET)  
88 criteria(23) and Core Outcome Set-STAndards for Development recommendations (COS-STAD)(24). It  
89 replicates our previous study, on doctor well-being.(22) The study was prospectively registered with the  
90 COMET Initiative(20) (Registration: 2433), and the findings are reported according to the Core Outcome Set-  
91 Standards for Reporting (COS-STAR) guidance.(25)

92

### 93 **Stakeholder Recruitment**

94 A purposive sampling strategy was adopted to recruit a participant panel from two stakeholder groups: (i)  
95 Academics, policymakers, governance and support services staff, known here collectively as nurse wellbeing  
96 experts and (ii) Registered Nurses working in the NHS, considered experts by experience. Some overlap  
97 between the groups was anticipated, so participants were asked to self-assign to a stakeholder group based  
98 on their primary job role. The inclusion criterion for the nurse wellbeing experts group were: Individuals who  
99 have been or are involved in the concept, design, organisation, delivery, teaching, audit, governance, policy,  
100 guidance, research, or wellbeing of health and care professionals. We identified nurse wellbeing experts from  
101 relevant healthcare workforce wellbeing conferences, publications, and special interest groups by searching  
102 previous conference proceedings, published guidelines, and the wellbeing literature. We further identified  
103 these stakeholders through recommendations from others. Potential participants were emailed a study  
104 invitation. All registered nurses working in the NHS were eligible to participate; an invitation was disseminated  
105 through our research, clinical academic and practitioner networks, social media, nursing professional bodies  
106 and nursing Trade Unions. Invitations included links to the participant information sheet, a brief video outlining  
107 the study, and the online Delphi Survey. Participants were required to complete a consent form – the first page  
108 of the online Delphi survey - before registering their details (name and email) and indicating which of the two  
109 stakeholder groups they identified with. Demographic data, including age, gender, geographical location,  
110 clinical specialty (for nurses), ethnicity, and religion, were collected at registration. Each participant was  
111 assigned a Study ID at registration, ensuring data were anonymous at the point of collection.

112

113 **Outcomes and Domains**

114 The starting point for this study was the list of 43 wellbeing outcomes used previously in the development of  
115 the Core Outcome Set for Doctor Wellbeing.(22) Using this set of outcomes allowed us to identify potential  
116 convergence between the consensus outcomes for doctor and nurse wellbeing. The 43 wellbeing outcomes  
117 are categorised into five domains: i) Overall appraisal of wellbeing, ii) Functional components of wellbeing, iii)  
118 Activity and participation components of wellbeing, iv) Work-related wellbeing, and v) Health and Care-specific  
119 Wellbeing.(26) The plain English descriptions of each outcome were reviewed for face validity, understanding  
120 and acceptability in a nursing context by our study advisory group (n=6) and modified according to feedback  
121 (Table 1).

122

123 **Delphi Survey and Analysis**

124 The Delphi technique aims to generate consensus by collecting opinions from stakeholder panel members and  
125 is widely used in developing core outcome sets.(27) Using the online survey platform DelphiManager, (28) we  
126 listed the 43 wellbeing outcomes with plain English descriptions by domain. These were displayed in random  
127 order to participants. The Delphi survey was conducted over two rounds (Round 1 ran from 1 March 2023 to  
128 24 March 2023, and Round 2 ran from 27 March to 30 April 2023). Adhering to the predefined Delphi survey  
129 guidelines,(23) we asked participants to rate the importance of including each outcome in the COS using a 9-  
130 point Likert Scale. For analysis, ratings were grouped: a rating of 1-3 on the Likert scale indicates the outcome  
131 is of 'limited importance' to include in the COS, a rating of 4-6 indicates the outcome is 'important, but not  
132 critical' to include, and a rating of 7-9 indicates that the outcome is 'critical' to include in a COS for the capture  
133 and measuring of nurses' wellbeing. These groupings were devised by the Grading of Recommendations  
134 Assessment, Development and Evaluation (GRADE) working group and have been used widely for Delphi  
135 methods.(29) Participants had the opportunity to provide a rationale for their ratings, and were also given the  
136 option to indicate if they felt unable to score an outcome. At the end of each Delphi Round, participants had  
137 the opportunity to suggest additional outcomes that they felt were not included among the 43 wellbeing  
138 outcomes. Participants were advised that suggested outcomes should not be a symptom, sign or disease, nor  
139 a determinant of wellbeing. The criterion for including suggested outcomes in the next Delphi round was that  
140 the published definition of the outcome differed significantly from the plain English descriptions of the existing  
141 outcomes. Participants who suggested an additional outcome were emailed by the research team, with the  
142 justification for including or excluding the outcome based on this criterion, and offering participants the  
143 opportunity to present further evidence or explanation.

144

145 In Round 2, the percentage of stakeholder panel members giving each rating for an outcome was fed back to  
146 participants. Summary scores were not provided by stakeholder group as the opinions of both were equally

147 important to the final COS. Participants were also reminded of their own ratings from Round 1 and were given  
148 the opportunity to revise their ratings after reviewing the feedback. Three email reminders were sent to  
149 participants to encourage the completion of a round.

150

151 The criteria for outcomes to be included in the COS were defined *a priori* as  $\geq 75\%$  of all participants rating an  
152 outcome as 'critical for inclusion' (rating 7-9). This aligns with our previous study(22) and other similar Core  
153 Outcome Sets (e.g., (30, 31, 32, 33)). The wellbeing outcomes that met this threshold for inclusion in the COS  
154 were communicated to all stakeholder panel members via email, along with an invitation to provide further  
155 comments and/or endorse the final COS.

156

### 157 **Ethical Approval**

158 This study, which involved human participants, received approval from the University of Southampton Faculty  
159 Ethics Committee (ERGO 78343). Informed consent was obtained from all participants prior to their  
160 participation in this study.

**Table 1. Outcomes and their descriptions by domain**

| Domain                                            | Outcome                | Description                                                                                                                                                                                                                                         |
|---------------------------------------------------|------------------------|-----------------------------------------------------------------------------------------------------------------------------------------------------------------------------------------------------------------------------------------------------|
| Overall appraisal of wellbeing                    | General Wellbeing      | A state of positive feelings/affect/happiness and meeting full potential in the world (being the best person you can be in society). It can be measured subjectively and objectively using a salutogenic (positive) approach.                       |
|                                                   | Meaning in life        | Separate concept to wellbeing, subjective sense of purpose, engagement with a philosophy of life, or life-goals, and fulfilment.                                                                                                                    |
|                                                   | Life satisfaction      | Separate concept to wellbeing, subjective appraisal of how much the person likes the life they lead; one of the indicators of quality of life.                                                                                                      |
|                                                   | Quality of life        | Separate concept to wellbeing, subjective appraisal of individuals position in life in the context of the culture and value system in which they live and in relation to their goals, expectations, standards, and concerns.                        |
|                                                   | Wellness               | Separate concept to wellbeing, subjective or objective evaluation of the active pursuit of behaviours, choices and lifestyles that lead to a state of holistic health.                                                                              |
| Functional component of wellbeing                 | Vitality               | Relaxed possession of energy (physical, mental, and emotional) and vigour; it is not actively strived for.                                                                                                                                          |
|                                                   | Optimism               | Hopeful transcendence beyond (rising above) immediate circumstances.                                                                                                                                                                                |
|                                                   | Personality            | Observable enduring characteristics/dispositions/tendencies to engage in certain patterns of behaviour.                                                                                                                                             |
|                                                   | Health                 | Subjective, or objective, evaluation of state of complete physical, mental, and social wellbeing, not merely the absence of disease or infirmity (the beneficial effects of green spaces, ability to relax, for example).                           |
|                                                   | Physiological function | Objective (snapshot) of body functions i.e., Electroencephalography (EEG), Heart Rate Variability, Electrodermal activity (temperature, sweating, cortisol levels).                                                                                 |
|                                                   | Cognitive function     | Objective evaluation of domains such as, but not limited to, Attention, Memory, and Processing speed.                                                                                                                                               |
|                                                   | Self-esteem            | Self-acceptance, self-worth (pride), sense of coherence (ability to predict events, belief in ability to manage them, that it is worth the effort, ability to be their true self, confidence in other achievements in non-work-related activities). |
|                                                   | Sleep                  | Subjective, or objective, evaluation of duration, quality, and sense of feeling restored.                                                                                                                                                           |
|                                                   | Financial security     | Objective ability to pay for satisfactory accommodation, bills, care of dependents, ability to save for retirement, ability to cope with a sudden fall in income, ability to pay unexpected but necessary expenses.                                 |
| Activity and participation component of wellbeing | Novelty                | Subjective, or objective, growth through new experiences, learning (including post traumatic growth).                                                                                                                                               |
|                                                   | Positive relationships | Subjective, or objective, assessment of beneficial human connections (family and friends).                                                                                                                                                          |
|                                                   | Sexual wellbeing       | Subjective, or objective, assessment of sense of self and body, appreciating feelings of pleasure and desire, developing, and maintaining mutually respectful gender equal relationships, safe and pleasurable sexual interactions.                 |

|                        |                                                                                                                                  |                                                                                                                                                                                                                                                                                                                   |
|------------------------|----------------------------------------------------------------------------------------------------------------------------------|-------------------------------------------------------------------------------------------------------------------------------------------------------------------------------------------------------------------------------------------------------------------------------------------------------------------|
|                        | Recreational activity                                                                                                            | Subjective, or objective, evaluation of the ability to participate and participation in non-work/leisure activities and the qualities of those chosen activities (example determinants are local investment and environment).                                                                                     |
|                        | Diet                                                                                                                             | Subjective, or objective, evaluation of the nutritional content, quantity, and timing.                                                                                                                                                                                                                            |
|                        | Physical activity                                                                                                                | Subjective, or objective, assessment of the ability to participate in physical activity and the quality and quantity of physical exercise.                                                                                                                                                                        |
|                        | Engagement with preventative medicine                                                                                            | Subjective, or objective, assessment of participation in screening programmes they are eligible for and vaccines, accessing timely treatment.                                                                                                                                                                     |
| Work-related wellbeing | Financial reward satisfaction                                                                                                    | Subjective, or objective, evaluation of ability to receive gratification from financial reward for effort (for example satisfaction with pay and pension).                                                                                                                                                        |
|                        | Personal safety                                                                                                                  | Subjective, or objective, ability to go about work, and get to and from work, free from threat and safe from physical or psychological harm (infection, radiation, bullying, theft, assault).                                                                                                                     |
|                        | Psychological need satisfaction                                                                                                  | Subjective, or objective, assessment of how autonomy (being in control of your life, work) belonging and competence needs have been supported by colleagues (inclusive, positive culture), managers (adequate workforce allow development), supporting services (IT, administration, legal, occupational health). |
|                        | Psychological safety                                                                                                             | Subjective, or objective, evaluation of the consequences of taking interpersonal risk at work (trust, information sharing).                                                                                                                                                                                       |
|                        | Job satisfaction                                                                                                                 | Subjective, or objective, evaluation of how much they like their choice of work profession, specialism, roles.                                                                                                                                                                                                    |
|                        | Morale                                                                                                                           | Subjective, or objective, evaluation of feelings about the future, ability of an individual, group or organisation to have and meet shared goals/values.                                                                                                                                                          |
|                        | Engagement                                                                                                                       | Subjective, or objective, assessment of involvement and absorption with, commitment to, work.                                                                                                                                                                                                                     |
|                        | Life work balance                                                                                                                | Subjective, or objective, quantity, quality, and equality of time away from work and at work, the salience/clarity of the roles (the ability to work flexibly).                                                                                                                                                   |
|                        | Workability                                                                                                                      | Timely, objective assessment of having occupational competence and virtues, the health required for competence in an appropriate work environment by appropriate occupational health professionals.                                                                                                               |
|                        | Self-care                                                                                                                        | Subjective, or objective, assessment of behaviours to look after own health and wellbeing at work (taking breaks, time off work for sickness), accessing appropriate support services, adequate resources (estates, workforce, rapid-access self-referral services) to support this.                              |
|                        | Professional Development                                                                                                         | Subjective, or objective, assessment of ability to participate and engage with learning and teaching knowledge and skills, and to progress.                                                                                                                                                                       |
|                        | Identification with work                                                                                                         | Subjective, or objective, assessment of value and meaning assumed by the individual, or a group/team, at work (pride in work, professional identity).                                                                                                                                                             |
| Resilience             | Subjective, or objective, individual, or group level, preservation of, or return to, previous function after exposure to trauma. |                                                                                                                                                                                                                                                                                                                   |



|                                    |                                     |                                                                                                                                                                                                                                                                            |
|------------------------------------|-------------------------------------|----------------------------------------------------------------------------------------------------------------------------------------------------------------------------------------------------------------------------------------------------------------------------|
|                                    | Emotional intelligence              | Subjective, or objective, self-awareness, self-management, social awareness, and relationship management.                                                                                                                                                                  |
|                                    | Voice and influence                 | Subjective, or objective, assessment of ideas, concerns and expectations expressed informing policy and practice.                                                                                                                                                          |
|                                    | Confidence in leadership            | Subjective or objective assessment of government and management competence, transparency and compassion, inclusivity, engagement and empowerment of those they are responsible and accountable for.                                                                        |
|                                    | Recognition satisfaction            | Subjective, or objective, evaluation of appreciation by colleagues, patients, public, government (civility).                                                                                                                                                               |
| Health and care specific wellbeing | Compassion satisfaction             | Subjective evaluation of ability to receive gratification from caregiving to patients, patients' families, colleagues (satisfaction with non-financial rewards of the work).                                                                                               |
|                                    | Altruism                            | Subjective, or objective, evaluation of selfless concern for the wellbeing of others (patients and colleagues).                                                                                                                                                            |
|                                    | Satisfaction with patient care      | Subjective, or objective, assessment of quality of health and social care their patients receive from themselves and others (impacted by things such as staffing levels, competence, equipment, estates and funding available).                                            |
|                                    | Job plan/rota/rotation satisfaction | Subjective, or objective, evaluation of ability of role, responsibilities/rota/breaks to account for the quantity, types, of work (workload), the intensity, duration, of physical, mental, and emotional demands and the rest/activities/resources needed to maintain it. |
|                                    | Good nursing practice               | Subjective or objective assessment of ability to engage with complex or challenging patients/cases and advocate for them as indicated and in an evidence-based way.                                                                                                        |

162 **RESULTS**

163 Study invitations were sent to 172 nurse wellbeing experts; of whom 33 consented and registered to  
164 participate, yielding a response rate of 19.2%. In addition, 29 Registered Nurses also agreed to  
165 participate, giving a total sample of 62 stakeholder panel participants. The mean age of participants  
166 was 48.1 years (range: 27 – 66 years); 48 participants (77.4%) self-identified as female, and 50 (80.7%)  
167 as White British. Four participants did not complete the survey (i.e. withdrew), and an additional four  
168 partially completed the survey. In total, 54 participants (87.1%) rated all 43 wellbeing outcomes (24  
169 Registered Nurses, 30 nurse wellbeing experts). Participants who rated some or all of the outcomes in  
170 Round 1 (n=58) were invited to participate in Round 2, with 45 participants (18 Registered Nurses, 27  
171 nurse wellbeing experts) completing Round 2, giving a retention rate from Round 1 to Round 2 of 87%.  
172 All participants in Round 2 rated all outcomes.

173  
174 In Round 1, six participants submitted eight suggestions for additional outcomes (Supplementary  
175 Materials 1). None of these suggestions met the criteria to be included for consideration in Round 2,  
176 either because the definition of an existing outcome already captured them or because they were  
177 pathologies (for example, two participants suggested burnout for inclusion). However, based on these  
178 recommendations and participant feedback, the definition of 'Identification with work' was amended  
179 to include 'professional identity', and the definitions of 'self-esteem' and 'identification with work'  
180 were amended to include 'pride'. None of the 43 outcomes were removed following Round 1. No  
181 additional outcomes were suggested in Round 2.

182  
183 At the end of Round 2, 13 outcomes met the  $\geq 75\%$  threshold for inclusion in the Core Outcome Set  
184 for capturing and measuring nurse wellbeing. These outcomes were: General wellbeing, Health, Sleep,  
185 Positive Relationships, Personal safety, Psychological need satisfaction, Psychological safety, job  
186 satisfaction, Morale, Life work balance, Compassion satisfaction, Satisfaction with patient care, Good  
187 nursing practice (Table 2). These outcomes were subsequently emailed to participants for further  
188 comment and review. Participants agreed to the final COS without further amendments.

189  
190  
191  
192  
193  
194  
195

196 **Table 2.** Final Core Outcome Set.

| Domain                                            | Outcome                         | % participants rating outcomes as 'critical' |
|---------------------------------------------------|---------------------------------|----------------------------------------------|
| Overall appraisal of wellbeing                    | General wellbeing *             | 93.18                                        |
| Functional component of wellbeing                 | Health*                         | 84.44                                        |
|                                                   | Sleep                           | 88.89                                        |
| Activity and participation component of wellbeing | Positive relationships          | 86.67                                        |
| Work-related wellbeing                            | Personal safety *               | 80.00                                        |
|                                                   | Psychological need satisfaction | 91.11                                        |
|                                                   | Psychological safety            | 88.89                                        |
|                                                   | Job satisfaction *              | 91.11                                        |
|                                                   | Morale*                         | 75.56                                        |
|                                                   | Life work balance*              | 80.00                                        |
| Health and social care specific wellbeing         | Compassion satisfaction         | 77.78                                        |
|                                                   | Satisfaction with patient care  | 93.33                                        |
|                                                   | Good nursing practice*          | 77.78                                        |

\*denotes Core Outcome Set for Capturing and Measuring Doctor Wellbeing (22) (Note: Good nursing practice is Good Clinical Practice)

197

198 **DISCUSSION**

199 This study developed the first Core Outcome Set (COS) specifically for capturing and measuring the  
 200 wellbeing of nurses working in the NHS. The stakeholder panel of registered nurses and nurse  
 201 wellbeing experts reached a consensus on a minimum set of 13 outcomes that should routinely be  
 202 captured and measured for nurse wellbeing. We recommend that future data collection initiatives  
 203 adopt this COS to ensure standardisation, enabling a consistent, comparable, and comprehensive  
 204 evidence-base with the potential to support decision-making for policy and practice. No prior COS has  
 205 been developed for the wellbeing of nurses. Previous research has focused on determinants and  
 206 interventions of nurse wellbeing rather than the outcomes that might demonstrate how these  
 207 determinants or interventions influence this profession. By creating this COS and promoting its use,  
 208 we seek to shift the current discourse towards an understanding of positive (salutogenic) components  
 209 of nurse wellbeing. This shift is critical for the development of effective wellbeing policies, strategies  
 210 and interventions that empower nurses to flourish in the workplace. Future research is now needed  
 211 to identify and evaluate outcome measurement instruments.

212

213 A strength of our approach is that it provides outcomes for each of the five wellbeing domains. Several  
 214 agreed-upon wellbeing outcomes, such as morale, personal safety, and job satisfaction, are already  
 215 captured through, for example, the NHS staff survey (34) and the RCN Employment survey.(35)  
 216 Whereas other outcomes, such as 'good nursing practice,' will require the identification of outcome

217 measurement instruments based on their descriptions in Table 1. Furthermore, the seven wellbeing  
218 outcomes that comprise the COS for capturing and measuring doctor's wellbeing (General wellbeing,  
219 Health, Personal Safety, Job satisfaction, Morale, Life-work balance, and Good Clinical Practice)(22)  
220 met the threshold for inclusion in the COS for nurses' wellbeing. This alignment suggests that factors  
221 considered relevant to doctors' wellbeing are similarly relevant to nurses. Indeed, previous research  
222 indicates that certain features of work-related wellbeing and mental ill-health are common across all  
223 NHS staff groups.(6) However, the additional outcomes identified for the COS for nurse wellbeing  
224 underscore important profession-specific differences that must be considered when developing  
225 policies, strategies, and interventions for nurses.

226

227 The methodology used in this study was robust and replicable, following the COS-STAD guidelines (24)  
228 and built on our previous work developing a COS for capturing and measuring doctor wellbeing. (22)  
229 The long list of outcomes presented to the stakeholder panel was evidence-based, (26) and our study  
230 advisory group ensured the relevance and validity of this list to nursing. The presentation of domains  
231 to the stakeholder panel participants was randomised using the DelphiManager platform (28) to avoid  
232 presentation bias. Furthermore, additional wellbeing outcomes suggested by participants during the  
233 Delphi survey were already represented by existing wellbeing outcomes, further supporting the  
234 comprehensiveness of the long list. The suggestions to add burnout as a wellbeing outcome reflect  
235 the current use of burnout and psychiatric morbidities as proxies for wellbeing, further underscoring  
236 the need for this COS. While the lack of an internationally agreed-upon operational definition of nurse  
237 wellbeing may be seen as a limitation, we addressed this by utilising our published operational  
238 definition of wellbeing (21) and the application of a salutogenic, consensus-based methodology. This  
239 approach enabled us to establish a panel-agreed COS for wellbeing outcomes relevant to nurses.

240

241 A further strength of this study was that it included registered nurses and nurse wellbeing professionals  
242 in the stakeholder panel. However, we acknowledge that stakeholders outside the present panel might  
243 have differing views. The sample size was appropriate for a Delphi study(24), as was the response rate  
244 from nurse wellbeing professionals to invitation and the overall retention rate. Our focus on nurses  
245 working in the UK's National Health Service (NHS) means that stakeholders were invited accordingly.  
246 The recruitment method for registered nurse stakeholders was designed to reach all nurses working in  
247 the NHS; however, we are unaware of how many potential participants saw our invitation and elected  
248 not to participate. While this COS might be relevant to nurses working in other healthcare systems –  
249 both in the UK and beyond – additional investigation is required to ensure its broader applicability.

250

251 We acknowledge that users of this COS may find it challenging to capture and measure all 13 outcomes  
252 that comprise this COS, and it should be noted that the feasibility of using this COS on every occasion  
253 nurse wellbeing is measured has not yet been tested. While we suggest these outcomes as a  
254 minimum, users may wish to include other outcomes relevant to their research or capture and  
255 measure only those outcomes from their domain of interest; for example, the work-related wellbeing  
256 domain with its six wellbeing outcomes or the subset of seven wellbeing outcomes common to both  
257 doctors and nurses. The robust methodology we have applied in this study could be repeated to assess  
258 the relevance of these outcomes to other healthcare professions. This COS provides a framework to  
259 better understand positive components of wellbeing in the nursing profession, and in line with COMET  
260 guidelines (23), our next step is to identify which outcome measurement instruments would be most  
261 appropriate and accessible for end users.

262

## 263 **CONCLUSION**

264 This study has identified a minimum set of wellbeing outcomes that should be used when measuring  
265 NHS nurse wellbeing. Implementing this COS will reduce heterogeneity in measurement approaches,  
266 facilitating evidence synthesis and benchmarking to better understand the current state of nurse  
267 wellbeing. Future efforts will focus on identifying and evaluating the most appropriate instruments  
268 for measuring these outcomes.

269

270 **Author Contributions:**

- 271
- GS and DSB devised the study and acquired funding.
  - NK designed the study, collected, analysed, and interpreted data, wrote the manuscript, and edited and approved the final article.
  - GS and DSB supervised the study's design, data collection, analysis, and interpretation and approved the final manuscript.
  - GS acts as guarantor.

277

278 **Funding:** This study was funded by the National Institute for Health Research (NIHR) Applied Research  
279 Collaboration Wessex (ARC Wessex) Mental Health Hub. For the purpose of open access, the author  
280 has applied a CC BY public copyright licence to any Author Accepted Manuscript arising from this  
281 submission.

282

283 **Disclaimer:** The views expressed in this publication are those of the authors and not necessarily those  
284 of the National Institute for Health and Care Research or the Department of Health and Social Care.

285

286 **Competing Interests:** None declared.

287

288 **Acknowledgements:** The authors would like to thank all those who participated in the Delphi survey  
289 and provided feedback on all stages of the research process, NIHR ARC Wessex for funding this  
290 research, Catherine Smith and Jane Ball for advising on the early stages of this study, and Professor  
291 Peter Griffiths for reviewing the draft manuscript.

292

293 **Data availability statement:** All data relevant to the study are included in the article or uploaded as  
294 supplementary materials.

295

296 **Ethics statement:** This study involved human participants and was approved by the University of  
297 Southampton Faculty Ethics Committee (ERGO 78343). Participants gave informed consent before  
298 participating.

299

300 **ORCID IDs:**

301 Naomi Klepacz [0000-0001-7552-8000](#)

302 David Baldwin [0000-0003-3343-0907](#)

303 Gemma Simons [0000-0003-2454-5948](#)

304

305 REFERENCES

- 306 1. Sizmur S, Raleigh V. The risks to care quality and staff wellbeing of an NHS system  
307 under pressure. Oxford: King's Fund; 2018.
- 308 2. Aiken L, Sloane DM, Ball J, Bruyneel L, Rafferty AM, Griffiths P. Patient satisfaction  
309 with hospital care and nurses in England: an observational study. *BMJ open*. 2021;8.
- 310 3. Maben J, Adams M, Peccei R, Murrells T, Robert G. 'Poppets and parcels': the links  
311 between staff experience of work and acutely ill older peoples' experience of hospital  
312 care. *Int J Older People Nurs*. 2012;7(2):83-94.
- 313 4. Hall LH, Johnson J, Watt I, Tsipa A, O'Connor DB. Healthcare Staff Wellbeing,  
314 Burnout, and Patient Safety: A Systematic Review. *PLoS One*. 2016;11(7):e0159015.
- 315 5. Boorman S. NHS Health and Well-being Review: Interim Report and Final Report.  
316 London; 2009.
- 317 6. Taylor C, Maben J, Jagosh J, Carrieri D, Briscoe S, Klepacz N, et al. Care Under  
318 Pressure 2: a realist synthesis of causes and interventions to mitigate psychological ill  
319 health in nurses, midwives and paramedics. *BMJ Qual Saf*. 2024:bmjqs-2023-016468.
- 320 7. Kinman G, Teoh K, Harriss A. The Mental Health and Wellbeing of Nurses and  
321 Midwives in the United Kingdom. London: The Society of Occupational Medicine; 2020.
- 322 8. Van der Heijden B, Brown Mahoney C, Xu Y. Impact of Job Demands and Resources  
323 on Nurses' Burnout and Occupational Turnover Intention Towards an Age-Moderated  
324 Mediation Model for the Nursing Profession. *IJERPH*. 2019;16(11):2011.
- 325 9. Khatatbeh H, Pakai A, Al-Dwaikat T, Onchonga D, Amer F, Premusz V, et al. Nurses'  
326 burnout and quality of life: A systematic review and critical analysis of measures used.  
327 *Nurs Open*. 2022;9(3):1564-74.
- 328 10. Shah MK, Gandrakota N, Cimiotti JP, Ghose N, Moore M, Ali MK. Prevalence of and  
329 Factors Associated With Nurse Burnout in the US. *JAMA Network Open*.  
330 2021;4(2):e2036469-e.
- 331 11. Barleycorn D. Awareness of secondary traumatic stress in emergency nursing.  
332 *Emergency Nurse*. 2019;27(5):19-22.
- 333 12. Ślusarska B, Nowicki GJ, Niedorys-Karczmarczyk B, Chrzan-Rodak A. Prevalence  
334 of Depression and Anxiety in Nurses during the First Eleven Months of the COVID-19  
335 Pandemic: A Systematic Review and Meta-Analysis. *IJERPH*. 2022;19(3):1154.
- 336 13. NHS Digital. NHS Workforce Statistics, December 2023 England and Organisation  
337 2023 [Available from: [https://digital.nhs.uk/data-and-](https://digital.nhs.uk/data-and-information/publications/statistical/nhs-workforce-statistics/december-2023)  
338 [information/publications/statistical/nhs-workforce-statistics/december-2023](https://digital.nhs.uk/data-and-information/publications/statistical/nhs-workforce-statistics/december-2023)].
- 339 14. Van Bogaert P, Wouters K, Willems R, Mondelaers M, Clarke S. Work engagement  
340 supports nurse workforce stability and quality of care: nursing team-level analysis in  
341 psychiatric hospitals. *Journal of Psychiatric and Mental Health Nursing*. 2013;20(8):679-  
342 86.
- 343 15. Nursing and Midwifery Council. 2023 NMC Register Leavers Survey. 2023.
- 344 16. NHS England. NHS Staff Survey Interactive Dashboard (Results of 2023 survey)  
345 2024 [Available from: <https://nhssurveys.co.uk/nss/survey-information/>].
- 346 17. Maben J, Peccei R, Adams M, Robert G, Richardson A, Murrells T, et al. Exploring  
347 the relationship between patients' experiences of care and the influence of staff  
348 motivation, affect and wellbeing. 2012.
- 349 18. Royal College of Nursing. Nursing Workforce Standards. London: Royal College of  
350 Nursing; 2021 07/05/2021. Contract No.: 009 681.

- 351 19. Bernardi FA, Alves D, Crepaldi N, Yamada DB, Lima VC, Rijo R. Data Quality in  
352 Health Research: Integrative Literature Review. *J Med Internet Res.* 2023;25:e41446.
- 353 20. COMET Initiative. Core Outcome Measures in Effectiveness Trials (COMET  
354 Initiative) database n.d [Available from: <https://www.comet-initiative.org/>].
- 355 21. Simons G, Baldwin DS. A critical review of the definition of 'wellbeing' for doctors  
356 and their patients in a post Covid-19 era. *Int J Soc Psychiatry.* 2021;67(8):984-91.
- 357 22. Simons G, Klepacz N, Baldwin DS. Which outcomes should be included in a core  
358 outcome set for capturing and measuring doctor well-being? A Delphi study. *medRxiv.*  
359 2024:2024.04.11.24305668.
- 360 23. Williamson PR, Altman DG, Bagley H, Barnes KL, Blazeby JM, Brookes ST, et al. The  
361 COMET Handbook: version 1.0. *Trials.* 2017;18(Suppl 3):280.
- 362 24. Kirkham JJ, Davis K, Altman DG, Blazeby JM, Clarke M, Tunis S, et al. Core outcome  
363 Set-STAndards for Development: the COS-STAD recommendations. *PLoS medicine.*  
364 2017;14(11):e1002447.
- 365 25. Kirkham JJ, Gorst S, Altman DG, Blazeby JM, Clarke M, Devane D, et al. Core  
366 Outcome Set-STAndards for Reporting: The COS-STAR Statement. *PLoS Med.*  
367 2016;13(10):e1002148.
- 368 26. Simons G. How should wellbeing be measured in UK doctors? A salutogenic,  
369 consensus approach, towards a Core Outcome Set for doctor wellbeing measurement:  
370 University of Southampton; 2022.
- 371 27. International Consortium Health Outcome Measurement. Our mission n.d. [  
372 28. COMET Initiative. DelphiManger 2023 [Available from: [https://www.comet-  
373 initiative.org/delphimanager/](https://www.comet-initiative.org/delphimanager/)].
- 374 29. Guyatt GH, Oxman AD, Vist GE, Kunz R, Falck-Ytter Y, Alonso-Coello P, et al.  
375 GRADE: an emerging consensus on rating quality of evidence and strength of  
376 recommendations. *BMJ.* 2008;336(7650):924-6.
- 377 30. Vogel C, Zwolinsky S, Griffiths C, Hobbs M, Henderson E, Wilkins E. A Delphi study  
378 to build consensus on the definition and use of big data in obesity research. *Int J Obes*  
379 (Lond). 2019;43(12):2573-86.
- 380 31. Knaapen M, Hall NJ, van der Lee JH, Butcher NJ, Offringa M, Van Heurn EWE, et al.  
381 Establishing a core outcome set for treatment of uncomplicated appendicitis in children:  
382 study protocol for an international Delphi survey. *BMJ Open.* 2019;9(5):e028861.
- 383 32. Santaguida P, Dolovich L, Oliver D, Lamarche L, Gilsing A, Griffith LE, et al.  
384 Protocol for a Delphi consensus exercise to identify a core set of criteria for selecting  
385 health related outcome measures (HROM) to be used in primary health care. *BMC Fam*  
386 *Pract.* 2018;19(1):152.
- 387 33. Blade J, Calleja MA, Lahuerta JJ, Poveda JL, de Paz HD, Lizan L. Defining a set of  
388 standardised outcome measures for newly diagnosed patients with multiple myeloma  
389 using the Delphi consensus method: the IMPORTA project. *BMJ Open.*  
390 2018;8(2):e018850.
- 391 34. NHS Staff Survey Coordination Centre. Technical guide to the 2023 staff survey  
392 data (Version 2). 2023.
- 393 35. Royal College of Nursing. State of the Profession Report: RCN Employment Survey  
394 2023. London; 2024 May 2024. Contract No.: 011 484.
- 395
